# Supplementary material for: One-step melamine-assisted synthesis of graphene-supported AuPt@Au nanocrystals for enhanced catalytic reduction of p-nitrophenol
Source: Royal Society of Chemistry journal article supplement (doi:10.1039/c5ra21645a), 2015-01-01
Supplement: c5ra21645a1.pdf [file c5ra21645a1.pdf]

## Supporting Information

### **One-step melamine-assisted synthesis of graphene-supported AuPt@Au nanocrystals for enhanced catalytic reduction of *p*- nitrophenol**

Qi Liu,<sup>a</sup> Yan-Ru Xu,<sup>a</sup> Ai-Jun Wang,<sup>a,b</sup> Jiu-Ju Feng<sup>a,b\*</sup>

<sup>a</sup> *School of Chemistry and Chemical Engineering, Henan Normal University, Xinxiang, 453007, China*

<sup>b</sup> *College of Chemistry and Life Science, College of Geography and Environmental Science, Zhejiang Normal University, Jinhua, 321004, China*

*\*Corresponding author: jjfeng@zjnu.cn; Tel./Fax: +86 579 82282269.*

## Experimental section

### 1. Chemicals

Graphite powder (99.95%, 8000 mesh), chloroauric acid ( $\text{HAuCl}_4$ ), chloroplatinic acid ( $\text{H}_2\text{PtCl}_6$ ), melamine, hydrazine hydrate (16.5 M), *p*-nitrophenol, sodium borohydride ( $\text{NaBH}_4$ ) and commercial Pt/C (10 wt%) were purchased from Shanghai Sigma Chemical Reagent Company. Other chemicals were of analytical grade and used without further purification. Twice-distilled water was used throughout the whole experiments.

### 2. Preparation of AuPt@Au NCs/rGO

For typical synthesis of AuPt@Au NCs/rGO, 0.0631 g melamine was firstly dissolved into 8.5 mL of the graphene oxide (GO) suspension ( $0.5 \text{ mg L}^{-1}$ ) under stirring. Then, 800  $\mu\text{L}$  of  $\text{HAuCl}_4$  (24.3 mM) and 520  $\mu\text{L}$  of  $\text{H}_2\text{PtCl}_6$  (38.6 mM) were subsequently injected into the suspension. After homogeneous mixing, 200  $\mu\text{L}$  of hydrazine hydrate solution (16.5 M) was drop-wisely put into the mixture. The mixed solution became black quickly and continually reacted for 10 min under constant stirring at 60 °C. Finally, the products were cleaned thoroughly and dried at room temperature. For comparison, individual  $\text{HAuCl}_4$  or  $\text{H}_2\text{PtCl}_6$  was used as the precursor, while the other experimental conditions were kept unchanged. The resulting products were denoted as Au/rGO and Pt/rGO, respectively.

### **3. Physical characterization**

The morphology and crystalline structure of the samples were characterized by transmission electron microscopy (TEM) and high-resolution TEM (HR-TEM) measurements at a JEM-2100F transmission electron microscope coupled with selective area electron diffraction (SAED). High angle annular dark-field scanning TEM (HAADF-STEM) image and elemental mapping images were recorded on a scanning TEM (STEM). X-ray diffraction (XRD) analysis was performed with a Philips PW3040/60 diffractometer. X-ray photoelectron spectroscopy (XPS) experiments were conducted at a K-Alpha XPS spectrometer (Thermo-Fisher, E. Grinstead, UK). Raman experiments were performed on a Renishaw Raman system model 1000 spectrometer with a CCD detector. Thermogravimetric analysis (TGA) was conducted in air on a NETZSCH STA 449C thermogravimetric analyzer. The samples were heated from room temperature to 900 °C at the heat rate of 10 °C min<sup>-1</sup>.

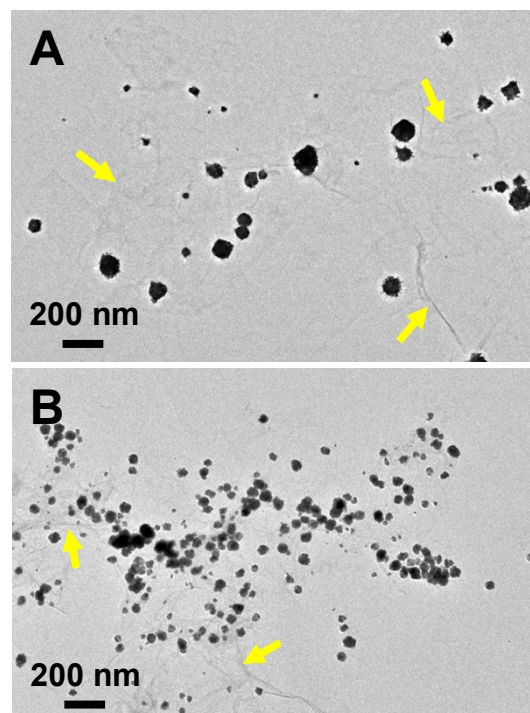

**Fig. S1.** TEM images of Au/rGO (A) and Pt/rGO (B). Arrows indicate the wrinkles of rGO.

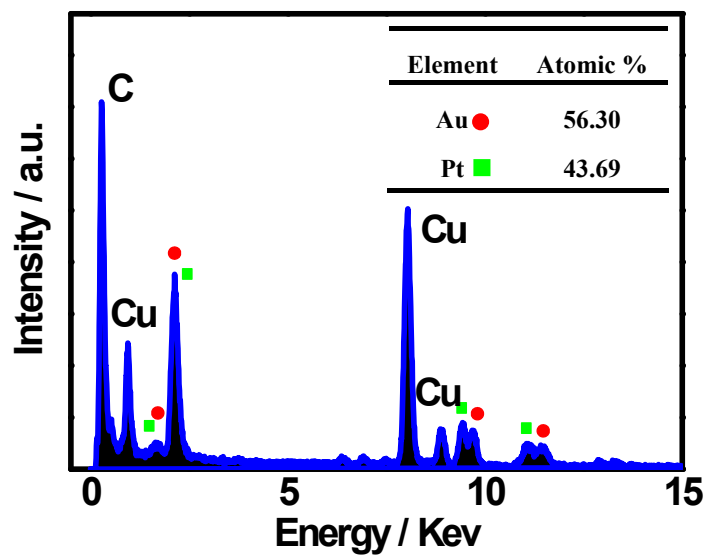

**Fig. S2.** EDS pattern of AuPt@Au NCs/rGO.

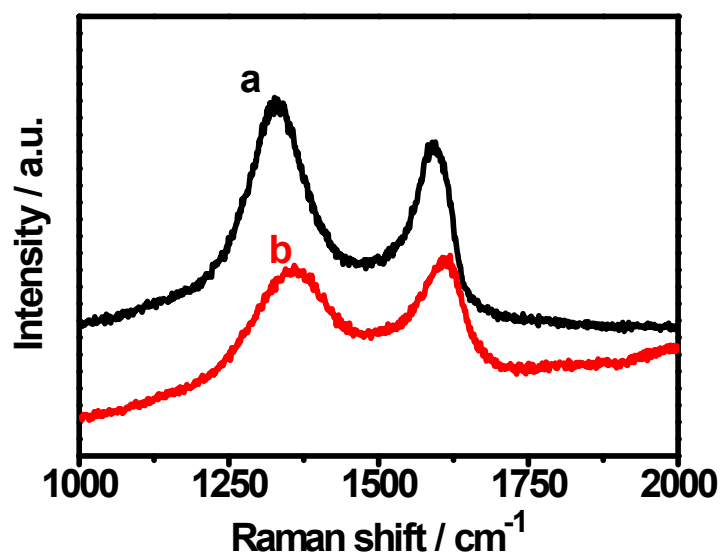

**Fig. S3.** Raman spectra of AuPt@Au NCs/rGO (curve a) and GO (curve b).

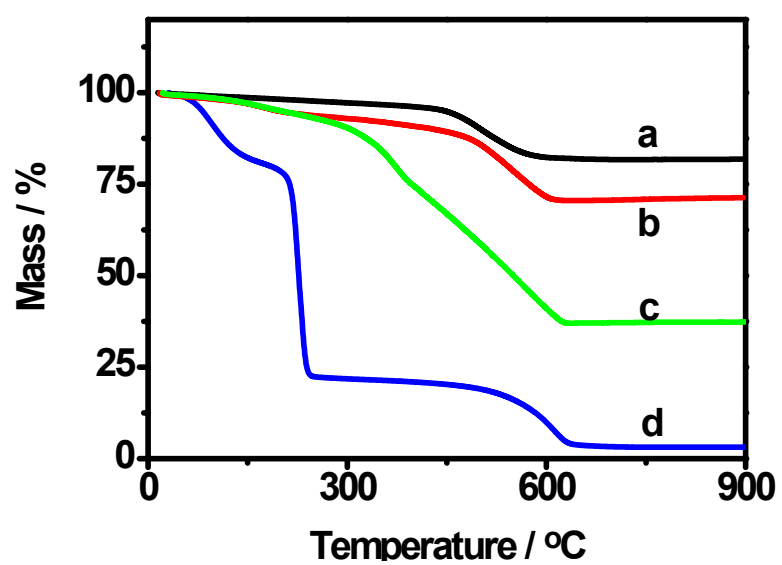

**Fig. S4.** TGA curves of AuPt@Au NCs/rGO (curve a), Au/rGO (curve b), Pt/rGO (curve c) and GO (curve d).

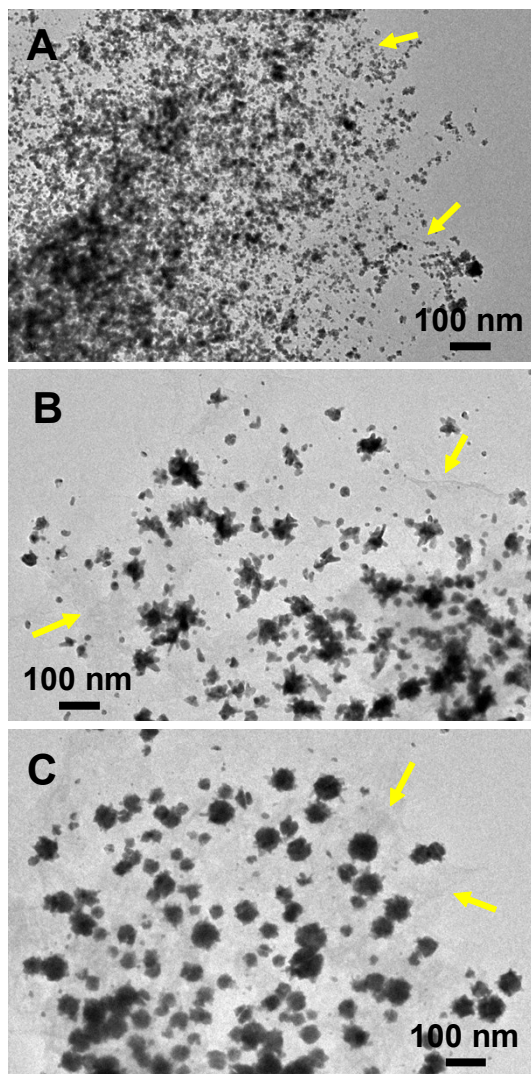

**Fig. S5.** TEM images of AuPt/rGO obtained without (A), and with 10 mM (B) and 25 mM (C) melamine. Arrows indicate the wrinkles of rGO.

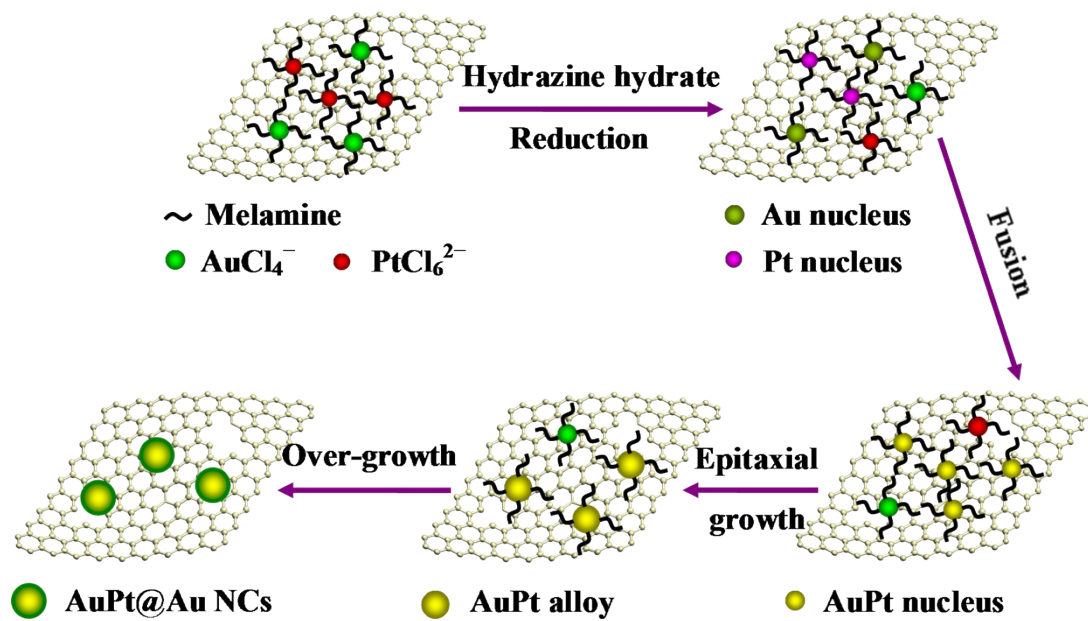

**Fig. S6.** Schematic illustration of the formation mechanism of AuPt@Au NCs/rGO.

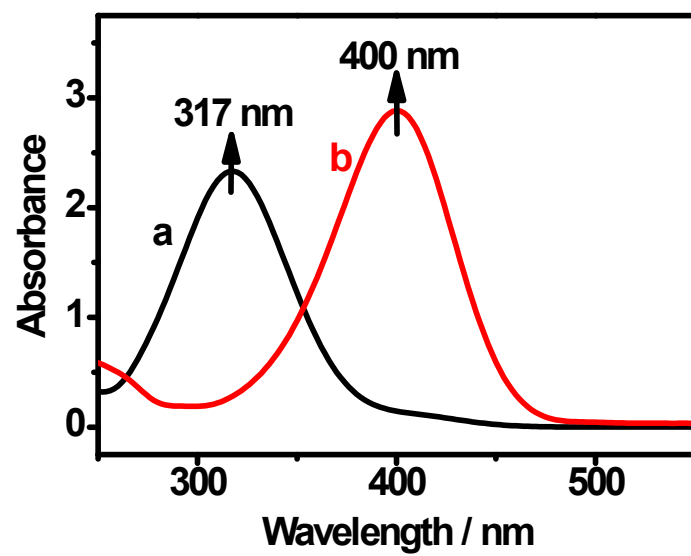

**Fig. S7.** UV-vis spectra of *p*-nitrophenol solution before (curve a) and after (curve b) the addition of NaBH<sub>4</sub>.
